# Supplementary material for: Lifestyle clusters and academic achievement in Australian Indigenous children: Empirical findings and discussion of ecological levers for closing the gap
Source: PubMed Central journal article supplement — SSM Popul Health. 2020 Jan 9;10:100535. doi: 10.1016/j.ssmph.2019.100535 (PMC6994709; doi:10.1016/j.ssmph.2019.100535), 2020-01-09
Supplement: mmc2.pdf [file mmc2.pdf]

1 **Supplementary Files**

2

3 **Figure S1.** Hierarchical agglomerative cluster dendrogram

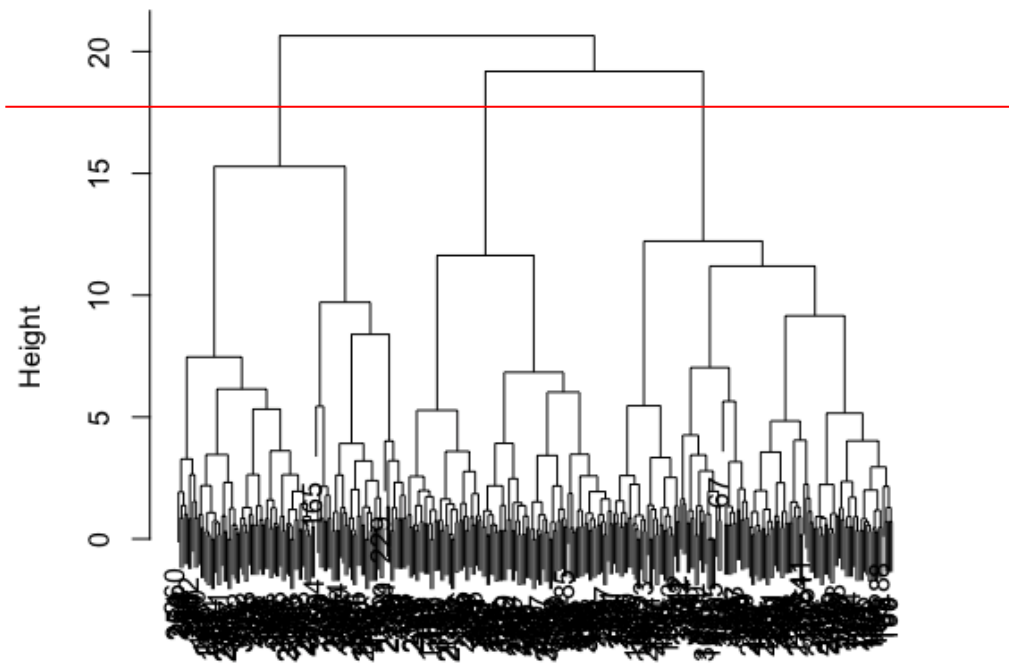

4

5 NB. Horizontal line illustrates the three-cluster structure of the data

6

7

- 1 **Figure S2.** Principal Components Analysis (PCA) Biplot: Outlying observations beyond the
- 2 97.5 percentile ellipse. Clusters indicated in colour.

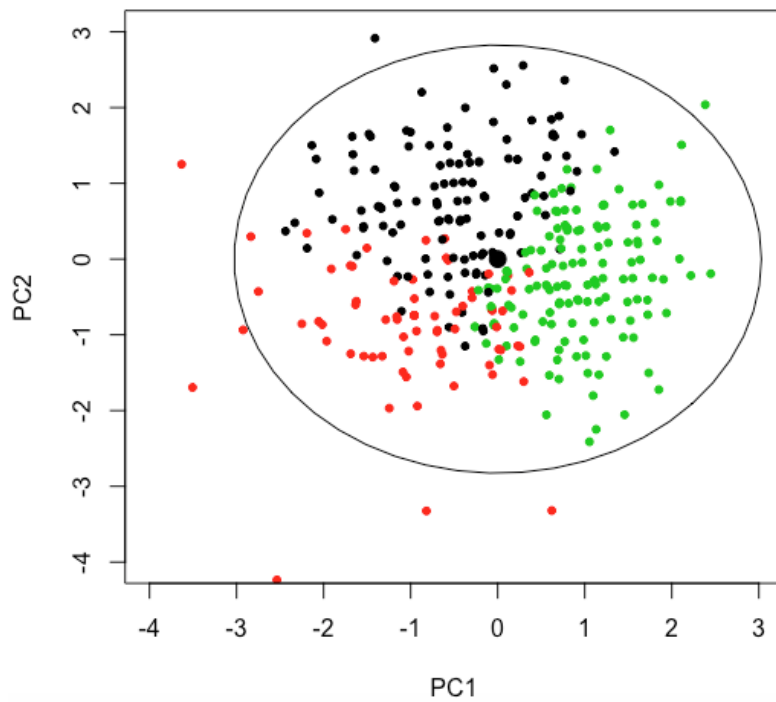

- 3
- 4
- 5 **Figure S3.** Principal Components Analysis (PCA): Biplot of data with outlying observations
- 6 removed. Clusters indicated in colour.

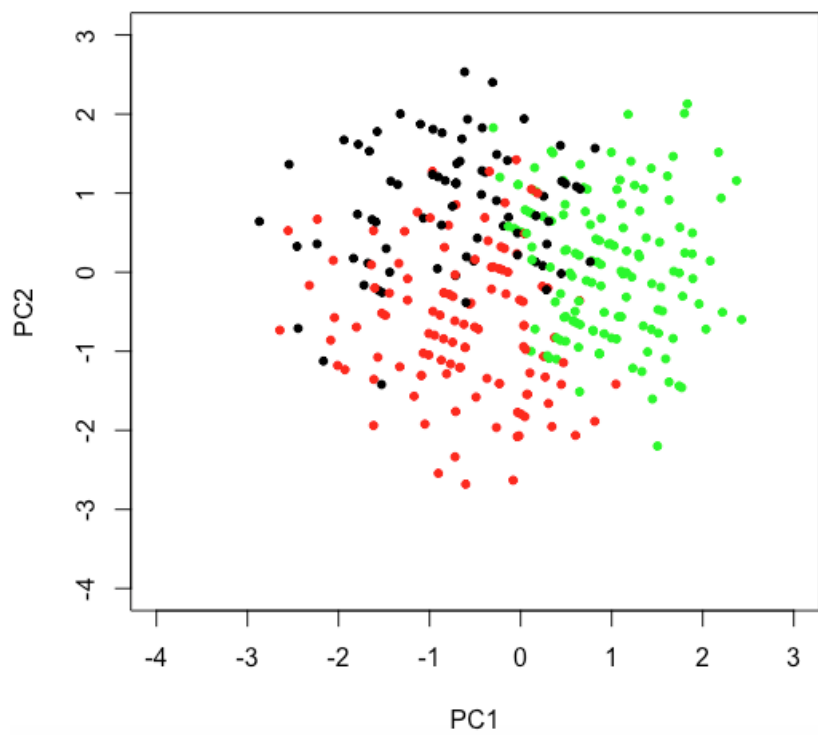

1
